# Supplementary material for: Comparative Efficacy and Safety of Interventions for the Treatment of Oral Lichen Planus: A Systematic Review and Network Meta-Analysis
Source: MDPI journal article supplement (doi:10.3390/jcm12082763), 2023-04-07
Supplement: s1 [file s1]

**Supplementary Table S1.** Articles excluded and reasons for exclusion

| Study            | Reason for Exclusion                                                                                 |
|------------------|------------------------------------------------------------------------------------------------------|
| Tyldesley 1977   | Not all participants in study underwent biopsy                                                       |
| Rodstrom 1994    | No quantitative data found that is suitable for analysis                                             |
| Gaeta 1994       | Article could not be found                                                                           |
| Sieg 1995        | No quantitative data found that is suitable for analysis                                             |
| Xu 2002          | Article was in Chinese Language                                                                      |
| Hegarty 2002     | No quantitative data found that is suitable for analysis                                             |
| Wei 2003         | Article could not be found                                                                           |
| Campisi 2004     | No quantitative data found that is suitable for analysis                                             |
| Lodi 2007        | Not a randomized clinical trial                                                                      |
| Chainani-Wu 2007 | No quantitative data found that is suitable for analysis                                             |
| Carbone 2008     | No quantitative data found that is suitable for analysis                                             |
| Radfar 2008      | Data is out of observation period of 4-6 weeks, and study included asymptomatic patients             |
| Malhotra 2008    | Adverse effects removed as number of patients with each adverse effect was not written specifically  |
| Ghabanchi 2009   | Multiple diseases included in the study                                                              |
| Mousavi 2009     | Data was not clearly reported in graph                                                               |
| Xiong 2009       | No quantitative data found that is suitable for analysis                                             |
| Georgaki 2010    | Article could not be found                                                                           |
| McCaughey 2011   | no quantitative data found that is suitable for analysis and asymptomatic patients included in study |
| Ahadian 2012     | Data was not adequate for quantitative analysis                                                      |
| Luo 2013         | Article could not be found                                                                           |
| Sun 2013         | Article could not be found                                                                           |
| Zuo 2013         | Article was in Chinese Language                                                                      |
| Liu C 2013       | No quantitative data found that is suitable for analysis                                             |

|                     |                                                                                                         |
|---------------------|---------------------------------------------------------------------------------------------------------|
| Amanat 2014         | No quantitative data found that is suitable for analysis                                                |
| Arduino 2014        | No quantitative data found that is suitable for analysis                                                |
| Pakferat 2015       | Reporting VAS and clinical score values did not allow for quantitative analysis:                        |
| Azizi 2016          | Not a randomized clinical trial (quasi-randomised)                                                      |
| Amirchaghmaghi 2016 | Study included patients with no symptoms                                                                |
| Vohra 2016          | No quantitative data found that is suitable for analysis                                                |
| Mostafa 2017        | Study included patients with no symptoms                                                                |
| Siponen 2017        | Reporting VAS and clinical score values did not allow for quantitative analysis:                        |
| Hesen 2017          | No quantitative data found that is suitable for analysis                                                |
| Kanjanabuch 2017    | No quantitative data found that is suitable for analysis                                                |
| Thomas 2017         | No quantitative data found that is suitable for analysis                                                |
| Riaz 2017           | Clinically diagnosed OLP & article could not be found                                                   |
| Singh 2017          | No histological diagnosis for 16/40 patients                                                            |
| Ezzat 2019          | Reporting VAS and clinical score values did not allow for quantitative analysis:                        |
| Villa 2020          | No histological diagnosis for patients, only patients with VAS score 7 and above were included in study |
| Qataya 2020         | No quantitative data found that is suitable for analysis                                                |
| Samiee 2020         | No quantitative data found that is suitable for analysis                                                |
| Bernnardo 2020      | Split mouth technique used                                                                              |
| Santonocito (2020)  | VAS score and clinical score did not allow for quantitative analysis                                    |
| Z D Zhu 2021        | Article was in Chinese Language                                                                         |
| Rogulj 2021         | Multiple diseases included in the study                                                                 |
| Zborowski 2021      | Split mouth technique used                                                                              |
| Saglam 2021         | No quantitative data found that is suitable for analysis                                                |
| Agha-Hosseini 2021  | no quantitative data found that is suitable for analysis                                                |
| Hijazi 2021         | Data was not clearly reported in graphs                                                                 |
| Ferri (2021)        | Clinical score did not allow for quantitative analysis                                                  |

|                       |                                                             |
|-----------------------|-------------------------------------------------------------|
| Saengprasittchok 2022 | Primary and secondary outcomes did not fulfill our criteria |
| Mamadapur 2022        | No histological diagnosis for patients                      |

**Supplementary Table S2.** Characteristics of included RCTs

| Author (Year) | Country | Study Design                                                                | Diagnosed by                                 | Type of OLP                 | Sample Size after Exclusion | Study Comparison | Duration of Treatment | Administration Method | Time of evaluations and assessments                                                                    | Outcome: Clinical Improvement | Outcome: Clinical Resolution | Outcome: Adverse Effects | Outcome: Pain Score              | Outcome: Clinical Score          |
|---------------|---------|-----------------------------------------------------------------------------|----------------------------------------------|-----------------------------|-----------------------------|------------------|-----------------------|-----------------------|--------------------------------------------------------------------------------------------------------|-------------------------------|------------------------------|--------------------------|----------------------------------|----------------------------------|
| Hashem (2019) | Egypt   | randomized controlled trial                                                 | confirmed by histopathology, symptomatic OLP | erosive, atrophic, combined | 40                          | TA vs HA         | 28 days               | topical               | 1. pre-treatment<br>2. 14 days<br>3. 21 days<br>4. 28 days                                             | nil                           | nil                          | nil                      | mean: 1.3 ; 1.4<br>sd: 0.9 ; 0.9 | mean: 0.5 ; 0.6<br>sd: 0.4 ; 0.5 |
| Ezzat (2019)  | Egypt   | prospective, randomized, double blind, parallel design clinical trial (RCT) | clinical and histological diagnosis of OLP   | erosive or atrophic         | 30                          | PIM vs BET       | 4 weeks               | topical               | 1. pre-treatment<br>2. 1 week<br>3. 2 weeks<br>4. 4 weeks<br>5. after 4 weeks of treatment free period | 15/15 ; 15/15                 | 9/15 ; 4/15                  | 6/15 ; 3/15              | nil                              | nil                              |

|                             |              |                                                                                               |                                                          |                            |    |                           |            |         |                                                                                                                                            |                      |             |                     |                                        |                                        |
|-----------------------------|--------------|-----------------------------------------------------------------------------------------------|----------------------------------------------------------|----------------------------|----|---------------------------|------------|---------|--------------------------------------------------------------------------------------------------------------------------------------------|----------------------|-------------|---------------------|----------------------------------------|----------------------------------------|
| Arduino<br>(2018)           | Italy        | random<br>ized,<br>placebo<br>-<br>controll<br>ed,<br>double<br>blind<br>study                | histological<br>diagnosis<br>based on<br>WHO<br>criteria | erosive                    | 32 | CLO<br>vs<br>PLA          | 8<br>weeks | topical | 1. pre-<br>treatment<br>2. After<br>4 weeks<br>3. After<br>8 weeks<br>4. After<br>24 weeks                                                 | 14/16 ;<br>10/16     | 1/16 ; 0/16 | 2/16 ;<br>1/16      | mean:<br>1.4 ; 3.2<br>sd:<br>1.7 ; 3.1 | mean:<br>2.7 ; 3.1<br>sd:<br>0.9 ; 0.6 |
| Bakhtia<br>ri<br>(2017)     | Iran         | random<br>ized<br>clinical<br>trial<br>(RCT)                                                  | clinical and<br>histological<br>diagnosis of<br>OLP      | reticular<br>or<br>erosive | 30 | PDT<br>vs<br>DEX          | 2<br>weeks | topical | 1. pre-<br>treatment<br>2. 15<br>days<br>3. 30<br>days<br>4. 60<br>days<br>5. 90<br>days                                                   | 6/15 ; 3/15          | 1/15 ; 0/15 | nil                 | nil                                    | nil                                    |
| Hettiara<br>chchi<br>(2017) | Sri<br>Lanka | random<br>ized,<br>compar<br>ative,<br>double<br>blind<br>clinical<br>trial<br>study<br>(RCT) | histolgically<br>confirmed<br>symptomati<br>c OLP        | reticular<br>or<br>erosive | 68 | TAC<br>vs<br>CLO          | 3<br>weeks | topical | 1. pre-<br>treatment<br>2. 3<br>weeks<br>after<br>treatment<br>commen<br>cement<br>3. 5<br>weeks<br>after<br>treatment<br>commen<br>cement | 11/34 ;<br>9/34      | nil         | 0/34 ;<br>0/34      | mean:<br>0.7 ; 0.8<br>sd:<br>0.8 ; 1   | mean:<br>1.9 ; 1.8<br>sd:<br>0.9 ; 1   |
| Siponen<br>(2017)           | Finlan<br>d  | random<br>ized,<br>multice<br>ntre,<br>double<br>blind,                                       | clinical and<br>histological<br>diagnosis of<br>OLP      | erosive                    | 27 | TAC<br>vs TA<br>vs<br>PLA | 3<br>weeks | topical | 1. pre-<br>treatment<br>2. week<br>3<br>3. week<br>6                                                                                       | 11/11 ;<br>7/7 ; 9/9 | nil         | 8/11 ;<br>3/7 ; 3/9 | nil                                    | nil                                    |

|                     |       |                                                                                                             |                                                     |                                             |    |                           |             |         |                                                                                              |                            |                            |                |                                      |                                        |
|---------------------|-------|-------------------------------------------------------------------------------------------------------------|-----------------------------------------------------|---------------------------------------------|----|---------------------------|-------------|---------|----------------------------------------------------------------------------------------------|----------------------------|----------------------------|----------------|--------------------------------------|----------------------------------------|
|                     |       | placebo -<br>controlled<br>parallel<br>random<br>ized<br>controlled<br>trial                                |                                                     |                                             |    |                           |             |         | 4. week<br>9<br>5. follow<br>up visit<br>at 6<br>months                                      |                            |                            |                |                                      |                                        |
| Sivaraman<br>(2016) | India | random<br>ized<br>controlled<br>trial<br>(RCT)                                                              | clinical and<br>histological<br>diagnosis of<br>OLP | reticular<br>and<br>erosive                 | 30 | CLO<br>vs TA<br>vs<br>TAC | 6<br>weeks  | topical | 1. pre-<br>treatment<br>2. week<br>1<br>3. week<br>3<br>4. week<br>6<br>5. after 3<br>months | 10/10 ;<br>10/10 ;<br>8/10 | 10/10 ;<br>10/10 ;<br>8/10 | nil            | nil                                  | nil                                    |
| Arunkumar<br>(2015) | India | prospective,<br>parallel<br>group,<br>random<br>ized,<br>active<br>controlled<br>clinical<br>study<br>(RCT) | clinical and<br>histological<br>diagnosis of<br>OLP | erosive,<br>ulcerative<br>or<br>symptomatic | 30 | TA vs<br>PIM              | 2<br>months | topical | 1. pre-<br>treatment<br>2. 1st<br>month<br>3. 2nd<br>month<br>4. 4th<br>month                | 15/15 ;<br>15/15           | nil                        | 0/15 ;<br>0/15 | mean:<br>4 ; 4<br>sd:<br>4.3 ; 4.3   | mean:<br>0.6 ; 0.9<br>sd:<br>0.5 ; 0.6 |
| Kia<br>(2015)       | Iran  | random<br>ized<br>clinical<br>trial<br>(RCT)                                                                | clinical and<br>histological<br>diagnosis of<br>OLP | atrophic<br>and<br>ulcerative               | 50 | CUR<br>vs TA              | 4<br>weeks  | topical | 1. pre-<br>treatment<br>2. at the<br>end of 2<br>weeks<br>3. at the<br>end of 4<br>weeks     | 19/25 ;<br>15/25           | 1/25 ; 1/25                | 0/25 ;<br>0/25 | mean:<br>2.6 ; 1.8<br>sd:<br>3 ; 1.8 | mean:<br>2.6 ; 3<br>sd:<br>1.3 ; 1     |

|                   |            |                                                                |                                                                         |                      |    |            |          |         |                                                                                                     |               |               |             |                                  |                                  |
|-------------------|------------|----------------------------------------------------------------|-------------------------------------------------------------------------|----------------------|----|------------|----------|---------|-----------------------------------------------------------------------------------------------------|---------------|---------------|-------------|----------------------------------|----------------------------------|
| Pakfetrat (2015)  | Itan       | single blind, clinical trial                                   | histopathologically confirmed OLP                                       | atrophic or erosive  | 28 | PIM vs TA  | 2 months | topical | 1. pre-treatment<br>2. every 2 weeks for 2 months (5 visits)                                        | 12/14 ; 12/14 | 10/14 ; 12/14 | nil         | nil                              | nil                              |
| Dillenburg (2014) | Brazil     | single-centre, randomized controlled, single-blind study (RCT) | symptomatic OLP and histological diagnosis of OLP based on WHO criteria | atrophic or erosive  | 42 | PDT vs CLO | 30 days  | topical | 1. pre-treatment<br>2. day 7<br>3. day 14<br>4. day 21<br>5. day 30<br>6. day 60<br>7. day 90       | 21/21 ; 21/21 | 13/21 ; 6/21  | 0/21 ; 5/21 | mean: 1.1 ; 1.7<br>sd: 0.3 ; 0.4 | mean: 1 ; 1.5<br>sd: 0.1 ; 0.1   |
| Fu (2012)         | West China | randomized, positive-controlled clinical trial (RCT)           | clinical and histological diagnosis of OLP                              | erosive              | 38 | AML vs DEX | 7 days   | topical | 1. day 0<br>2. day 7                                                                                | 17/20 ; 17/18 | 7/20 ; 7/18   | 3/20 ; 4/18 | mean: 1 ; 1.1<br>sd: 1.3 ; 1.3   | mean: 6.1 ; 5.1<br>sd: 8.5 ; 6.3 |
| Revana ppa (2012) | India      | randomized controlled study                                    | histopathologically confirmed OLP, symptomatic OLP                      | erosive and atrophic | 60 | TAC vs TA  | 4 weeks  | topical | 1. pre-treatment<br>2. 14 days treatment<br>3. evaluation end of every week for 4 consecutive weeks | 28/30 ; 16/30 | 20/30 ; 3/30  | 0/30 ; 0/30 | mean: 1.2 ; 2.7<br>sd: 2.6 ; 2.5 | mean: 2.3 ; 1.2<br>sd: 1.1 ; 1.4 |

|                        |       |                                                                    |                                            |                                     |     |            |           |         |                                                                                                                         |                  |                 |                |                                      |                                        |
|------------------------|-------|--------------------------------------------------------------------|--------------------------------------------|-------------------------------------|-----|------------|-----------|---------|-------------------------------------------------------------------------------------------------------------------------|------------------|-----------------|----------------|--------------------------------------|----------------------------------------|
| Agha-Hossein i (2010)  | Iran  | random ized, double blind, placebo - controll ed trial (RCT)       | clinical and histological diagnosis of OLP | erosive                             | 37  | PUR vs PLA | 6 month s | topical | 1. pre-treatment<br>2. 2 weeks<br>3. 1 month<br>4. 2 months<br>5. 3 months<br>6. 4 months<br>7. 5 months<br>8. 6 months | 16/20 ;<br>3/17  | nil             | 0/20 ;<br>0/17 | nil                                  | nil                                    |
| Salazar-Sanchez (2010) | Spain | random ized, double blind study, placebo - controll ed trial (RCT) | clinical and histological diagnosis of OLP | sympto matic erosive or ulcerativ e | 55  | AV vs PLA  | 12 weeks  | topical | 1. pre-treatment<br>2. 6 weeks<br>3. 12 weeks                                                                           | 29/32 ;<br>20/29 | 10/32 ;<br>5/29 | 0/32 ;<br>0/29 | mean:<br>2.7 ; 3.4<br>sd:<br>2.8 ; 3 | mean:<br>1.7 ; 1.8<br>sd:<br>1.3 ; 1.2 |
| Nolan (2009)           | UK    | random ized, double blind study, placebo - controll ed trial (RCT) | clinical and histological diagnosis of OLP | erosive or atrophic and ulcerativ e | 113 | HA vs PLA  | 28 days   | topical | 1. pre-treatment<br>2. 15 days<br>3. 29 days                                                                            | nil              | nil             | nil            | nil                                  | mean:<br>13 ; 13.5<br>sd:<br>0.7 ; 0.7 |

|                    |          |                                                                  |                                                             |                      |    |            |          |          |                                                                                                                                          |               |             |             |                                  |                                  |
|--------------------|----------|------------------------------------------------------------------|-------------------------------------------------------------|----------------------|----|------------|----------|----------|------------------------------------------------------------------------------------------------------------------------------------------|---------------|-------------|-------------|----------------------------------|----------------------------------|
| Choonhakarn (2008) | Thailand | randomized, double blind study, placebo - controlled trial (RCT) | clinical and histological diagnosis of OLP                  | atrophic and erosive | 54 | AV vs PLA  | 8 weeks  | topical  | 1. pre-treatment<br>2. 2 weeks<br>3. 4 weeks<br>4. 6 weeks<br>5. 8 weeks                                                                 | 26/27 ; 14/27 | 2/27 ; 0/27 | 2/27 ; 0/27 | nil                              | mean: 1.1 ; 2.4<br>sd: 0.6 ; 0.6 |
| Corrocher (2008)   | Italy    | randomized, controlled, double blind clinical trial (RCT)        | clinical and histological diagnosis of OLP, symptomatic OLP | moderate or severe   | 32 | TAC vs CLO | 4 weeks  | topical  | 1. pre-treatment<br>2. 4 weeks after beginning treatment<br>3. 6 weeks after beginning treatment (2 weeks after discontinuing treatment) | 16/16 ; 16/16 | 9/16 ; 0/16 | 9/16 ; 0/16 | mean: 0.3 ; 1.3<br>sd: 0.5 ; 0.6 | mean: 0.4 ; 1.1<br>sd: 0.5 ; 0.3 |
| Malhotra (2008)    | India    | randomized clinical trial (RCT)                                  | clinical and histological diagnosis of OLP                  | erosive              | 46 | BET vs TA  | 6 months | systemic | 1. pre-treatment<br>2. 2 weeks<br>3. 4 weeks<br>4. 8 weeks<br>5. 12 weeks                                                                | 17/25 ; 16/24 | nil         | nil         | nil                              | mean: 3.1 ; 2<br>sd: 1.9 ; 1.7   |



|                   |             |                                                                                                          |                                                     |                                                                                    |    |               |                 |         |                                                                                                                                                                                                |             |             |                |                                          |                                               |
|-------------------|-------------|----------------------------------------------------------------------------------------------------------|-----------------------------------------------------|------------------------------------------------------------------------------------|----|---------------|-----------------|---------|------------------------------------------------------------------------------------------------------------------------------------------------------------------------------------------------|-------------|-------------|----------------|------------------------------------------|-----------------------------------------------|
|                   |             |                                                                                                          |                                                     |                                                                                    |    |               |                 |         | weeks<br>6. 16<br>weeks<br>7. 20<br>weeks<br>8. 24<br>weeks                                                                                                                                    |             |             |                |                                          |                                               |
| Volz<br>(2008)    | Germa<br>ny | prospec<br>tive,<br>double<br>blind,<br>random<br>ized,<br>placebo<br>-<br>controll<br>ed trial<br>(RCT) | clinical and<br>histological<br>diagnosis of<br>OLP | erosive                                                                            | 20 | PIM vs<br>PLA | 30<br>days      | topical | 1. pre-<br>treatment<br>2. after<br>30 days<br>(end of<br>blinded<br>treatment<br>period)<br>3. after<br>60 days<br>(end of<br>follow<br>up or end<br>of open<br>label<br>treatment<br>period) | 7/10 ; 4/10 | 7/10 ; 2/10 | 5/10 ;<br>1/10 | nil                                      | nil                                           |
| Gourohi<br>(2007) | Iran        | investi<br>gator<br>blinded<br>parallel<br>group,<br>random<br>ized<br>clinical<br>trial<br>(RCT)        | histologicall<br>y confirmed<br>OLP                 | reticular<br>, erosive<br>or<br>ulcerativ<br>e,<br>erythem<br>atous or<br>atrophic | 35 | PIM vs<br>TA  | 2<br>month<br>s | topical | 1. pre-<br>treatment<br>2.<br>Weekly<br>visits<br>3. 2<br>months<br>of<br>treatment<br>free<br>observati<br>on                                                                                 | nil         | nil         | 2/18 ;<br>0/17 | mean: -<br>8.8, -9.3<br>sd:<br>11.1 ; 18 | mean: -<br>0.7 ; -<br>0.7<br>sd:<br>0.6 ; 0.7 |

|                    |          |                                                                        |                                                             |                               |    |            |          |         |                                                                                                                          |               |             |             |                                  |                                |
|--------------------|----------|------------------------------------------------------------------------|-------------------------------------------------------------|-------------------------------|----|------------|----------|---------|--------------------------------------------------------------------------------------------------------------------------|---------------|-------------|-------------|----------------------------------|--------------------------------|
| Passeron (2007)    | France   | double blind, randomized, prospective trial with placebo control (RCT) | clinical and histological diagnosis of OLP                  | erosive                       | 12 | PIM vs PLA | 4 weeks  | topical | 1. Day 0<br>2. Day 14<br>3. Day 28                                                                                       | 5/6 ; 3/6     | nil         | 2/6 ; 0/6   | mean: 0.8 ; 0.7<br>sd: 1 ; 0.8   | nil                            |
| Thongprasom (2007) | Thailand | randomized controlled trial (RCT)                                      | clinical and histological diagnosis of OLP, symptomatic OLP | atrophic-erosive, symptomatic | 12 | CYC vs TA  | 8 weeks  | topical | 1. pre-treatment<br>2. week 2<br>3. week 4<br>4. week 8<br>5. follow up after 12 weeks and every 3 months up till a year | 2/6 ; 6/6     | 0/6 ; 3/6   | 6/6 ; 0/6   | nil                              | nil                            |
| Conrotto (2006)    | Italy    | randomized, comparative, controlled, double blind study (RCT)          | clinical and histological diagnosis of OLP                  | atrophic or erosive           | 39 | CLO vs CYC | 2 months | topical | 1. pre-treatment<br>2. every 2 weeks during 2 month treatment and 2 month follow up                                      | 18/19 ; 13/20 | 9/19 ; 3/20 | 6/19 ; 1/20 | mean: 1.8 ; 2.3<br>sd: 2.1 ; 1.7 | mean: 2 ; 3.1<br>sd: 1.2 ; 1.6 |

|                             |                                                    |                                                                        |                                                                             |                                                                                             |     |                  |               |         |                                                                                                                                      |                  |             |                 |                                        |                                        |
|-----------------------------|----------------------------------------------------|------------------------------------------------------------------------|-----------------------------------------------------------------------------|---------------------------------------------------------------------------------------------|-----|------------------|---------------|---------|--------------------------------------------------------------------------------------------------------------------------------------|------------------|-------------|-----------------|----------------------------------------|----------------------------------------|
| Laeijen<br>decker<br>(2006) | Nether<br>lands                                    | prospec<br>tive,<br>random<br>ized<br>study<br>(RCT)                   | clinical and<br>histological<br>diagnosis of<br>OLP                         | erosive<br>or<br>ulcerativ<br>e,<br>atrophic<br>or<br>erythem<br>atous,<br>hyperke<br>ratic | 40  | TAC<br>vs TA     | 6<br>weeks    | topical | 1. pre-<br>treatment<br>2. after 6<br>weeks                                                                                          | 18/20 ;<br>9/20  | 6/20 ; 2/20 | 8/20 ;<br>3/20  | nil                                    | mean:<br>0.8 ; 0.6<br>sd:<br>1.5 ; 0.7 |
| Yoke<br>(2006)              | Singap<br>ore,<br>Korea,<br>India,<br>Thaila<br>nd | random<br>ized<br>controll<br>ed trial<br>(RCT)                        | clinical and<br>histological<br>diagnosis of<br>OLP,<br>symptoma<br>tic OLP | erosive,<br>reticular<br>,<br>atrophic<br>, mixed,<br>combina<br>tions                      | 139 | CYC<br>vs TA     | 8<br>weeks    | topical | 1. Week<br>0<br>2. Week<br>2<br>3. Week<br>4<br>4. Week<br>8                                                                         | 29/68 ;<br>41/71 | nil         | 19/68 ;<br>3/71 | mean:<br>1.6 ; 1.3<br>sd:<br>2.4 ; 2.3 | nil                                    |
| Swift<br>(2005)             | USA                                                | random<br>ized<br>controll<br>ed trial<br>(RCT)                        | histologicall<br>y<br>diagnosed,<br>direct<br>immunofluo<br>rescence        | erosive                                                                                     | 18  | PIM vs<br>PLA    | 4<br>weeks    | topical | 1. pre-<br>treatment<br>2. midpoint<br>(week 2)<br>3. final<br>(week 4)                                                              | nil              | nil         | 1/10 ;<br>0/10  | mean:<br>2.1 ; 2.4<br>sd:<br>2.3 ; 1.6 | nil                                    |
| Lundqui<br>st<br>(1995)     | Swede<br>n                                         | compar<br>ative<br>random<br>ized<br>study<br>(RCT,<br>split<br>mouth) | clinical and<br>histological<br>diagnosis of<br>OLP,<br>symptoma<br>tic OLP | reticular<br>,<br>papular,<br>plaque,<br>bullous,<br>atrophic<br>, erosive                  | 18  | PDT<br>vs<br>PLA | 24-36<br>days | topical | 1. pre-<br>treatment<br>2. end of<br>treatment<br>3. 1<br>month<br>follow<br>up<br>4. 6<br>months<br>follow<br>up<br>5. 12<br>months | 13/18 ;<br>6/18  | nil         | 16/18 ;<br>0/18 | nil                                    | nil                                    |

|                      |                 |                                                                                      |                                                                                         |                                                                        |    |                  |                 |         |                                                                                                                   |                  |                 |                |                                        |                                        |
|----------------------|-----------------|--------------------------------------------------------------------------------------|-----------------------------------------------------------------------------------------|------------------------------------------------------------------------|----|------------------|-----------------|---------|-------------------------------------------------------------------------------------------------------------------|------------------|-----------------|----------------|----------------------------------------|----------------------------------------|
|                      |                 |                                                                                      |                                                                                         |                                                                        |    |                  |                 |         | follow<br>up                                                                                                      |                  |                 |                |                                        |                                        |
| Voute<br>(1993)      | Nether<br>lands | random<br>ized,<br>double<br>blind,<br>placebo<br>-<br>controll<br>ed trial<br>(RCT) | clinical,<br>histopatholo<br>gic and<br>immunofluo<br>resence<br>microscopy<br>findings | erosive,<br>reticular<br>,<br>atrophic<br>, mixed,<br>combina<br>tions | 40 | FLU<br>vs<br>PLA | 9<br>weeks      | topical | 1. pre-<br>treatment<br>2. 3<br>weeks<br>after<br>3. 6<br>weeks<br>4. 9<br>weeks                                  | 18/20 ;<br>12/20 | 4/20 ; 0/20     | 0/20 ;<br>0/20 | nil                                    | mean:<br>1.5 ; 2.8<br>sd:<br>1.2 ; 1.1 |
| Eisen<br>(1990)      | USA             | random<br>ized,<br>double<br>blind<br>analysi<br>s<br>(RCT)                          | histological<br>ly confirmed<br>OLP                                                     | erosive/<br>erythem<br>atous<br>(sympto<br>matic)                      | 16 | CYC<br>vs<br>PLA | 8<br>weeks      | topical | 1. pre-<br>treatment<br>2.<br>biweekly<br>thereafte<br>r                                                          | 8/8 ; 1/8        | nil             | 3/20 ;<br>7/20 | mean:<br>0.4 ; 1.6<br>sd:<br>0.6 ; 0.8 | mean:<br>0.3 ; 1.7<br>sd:<br>0.3 ; 1.1 |
| Sonthali<br>a (2012) | India           | random<br>ized,<br>double<br>blind<br>trial                                          | histological<br>ly diagnosed<br>OLP                                                     | erosive<br>or<br>ulcerativ<br>e                                        | 40 | TAC<br>vs<br>CLO | 8<br>weeks      | topical | 1. pre-<br>treatment<br>2. 2<br>weeks<br>3. 4<br>weeks<br>4. 8<br>weeks<br>5. post<br>treatment<br>at 12<br>weeks | 19/20 ;<br>14/20 | 14/20 ;<br>8/20 | 0/14 ;<br>0/14 | nil                                    | mean:<br>3.2 ; 1.7<br>sd:<br>2.8 ; 1.3 |
| Bhatt<br>(2021)      | India           | random<br>ized<br>clinical<br>trial                                                  | clinical &<br>histological<br>diagnosis                                                 | reticular<br>,<br>atrophic<br>,                                        | 60 | AV vs<br>PDT     | 2<br>month<br>s | Topical | 1. pre-<br>treatment<br>2. 2<br>months                                                                            | nil              | nil             | 0/30 ;<br>0/30 | mean:<br>4.5 ; 3.8<br>sd: 0.3 ;<br>0.3 | nil                                    |

|                  |        |                                                                 |                                                                             |                                         |    |                   |                 |          |                                                                                                                                                                                                           |     |                  |                  |                                        |     |
|------------------|--------|-----------------------------------------------------------------|-----------------------------------------------------------------------------|-----------------------------------------|----|-------------------|-----------------|----------|-----------------------------------------------------------------------------------------------------------------------------------------------------------------------------------------------------------|-----|------------------|------------------|----------------------------------------|-----|
|                  |        |                                                                 |                                                                             | erosive,<br>papular                     |    |                   |                 |          | 3. 9<br>months                                                                                                                                                                                            |     |                  |                  |                                        |     |
| Samimi<br>(2020) | France | random<br>ized,<br>double-<br>blind,<br>control<br>led<br>study | clinically &<br>histologicall<br>y confirmed<br>based on<br>WHO<br>criteria | erosive                                 | 76 | PLA<br>vs<br>BET  | 3<br>month<br>s | Topical  | 1. pre-<br>treatment<br>2. 3<br>months<br>3. 6<br>months                                                                                                                                                  | nil | 9/33 ;<br>13/33  | 17/33 ;<br>10/33 | nil                                    | nil |
| Ferri<br>(2020)  | Brazil | random<br>ized,<br>control<br>led,<br>double-<br>blind<br>study | clinical &<br>histological<br>diagnosis                                     | atrophic<br>,<br>reticular<br>, erosive | 34 | PDT<br>vs<br>CLO  | 30<br>days      | Topical  | 1. pre-<br>treatment<br>2. once a<br>week<br>during<br>treatment<br>(for 30<br>days)<br>3. 30<br>days<br>after<br>treatment<br>4. 60<br>days<br>after<br>treatment<br>5. 90<br>days<br>after<br>treatment | nil | 12/17 ;<br>14/17 | 0/17 ;<br>0/17   | mean:<br>2.1 ; 1.9<br>sd: 2.0 ;<br>2.2 | nil |
| Kia<br>(2020)    | Iran   | double<br>blinded<br>random<br>ized<br>clinical<br>trial        | clinical &<br>histological<br>diagnosis                                     | erosive<br>&<br>atrophic                | 60 | CYR<br>vs<br>PRED | 1<br>month      | Systemic | 1. pre-<br>treatment<br>2. 1st<br>week<br>3. 2nd<br>week                                                                                                                                                  | nil | nil              | nil              | mean:<br>2.7 ; 2.3<br>sd: 2.9 ;<br>2.0 | nil |

|                     |        |                                        |                                   |                    |    |            |           |         |                                                                                                                                                |                  |                 |                |                               |                               |
|---------------------|--------|----------------------------------------|-----------------------------------|--------------------|----|------------|-----------|---------|------------------------------------------------------------------------------------------------------------------------------------------------|------------------|-----------------|----------------|-------------------------------|-------------------------------|
|                     |        |                                        |                                   |                    |    |            |           |         | 3. 4th week                                                                                                                                    |                  |                 |                |                               |                               |
| Santono cito (2020) | Italy  | random ized controll ed clinical trial | clinical & histological diagnosis | erosive & atrophic | 40 | CLO vs PLA | 3 month s | Topical | 1. pre-treatment<br>2. after 3 months                                                                                                          | 16/20 ;<br>12/20 | 13/20 ;<br>6/20 | 6/20 ;<br>0/20 | nil                           | nil                           |
| Georga ki (2021)    | Greece | random ized controll ed study          | clinical & histological diagnosis | erosive & atrophic | 32 | DEX vs CYC | 1 month   | Topical | 1. pre-treatment<br>2. every week for the first month<br>3. every 15 days for the second month<br>4. once a month for the subsequen t 4 months | nil              | nil             | 7/18 ;<br>3/14 | mean:<br>1.3 ; 2.1<br>sd: nil | mean:<br>2.1 ; 2.6<br>sd: nil |

**Supplementary Table S3.** Results of network meta-analysis: Clinical Improvement of Oral Lichen Planus with SUCRA ranking

| Interventions | Clinical Improvement in Oral Lichen Planus |               |                    |
|---------------|--------------------------------------------|---------------|--------------------|
|               | Relative Risk (95% CI)                     | P-value       | SUCRA rank (Score) |
| PUR           | 4.53 (1.46– 14.11)                         | <b>0.010*</b> | 1 (96.5)           |
| CUR           | 1.71 (0.91- 3.22)                          | 0.095         | 2 (67.4)           |
| PDT           | 1.58 (1.01- 2.46)                          | <b>0.044*</b> | 3 (62.1)           |
| AV            | 1.53 (1.05- 2.24)                          | <b>0.028*</b> | 4 (57.2)           |
| TopCALN       | 1.39 (1.06- 1.81)                          | <b>0.016*</b> | 5 (47.3)           |
| SysCORT       | 1.38 (0.73- 2.59)                          | 0.319         | 6 (43.0)           |
| TopCORT       | 1.35 (1.06- 1.73)                          | <b>0.017*</b> | 7 (40.5)           |
| AML           | 1.22 (0.71-2.09)                           | 0.478         | 8 (30.0)           |
| PLA           | Reference                                  |               | 9 (6.0)            |

Note: presence of (\*) and texts in red indicates intervention is statistically significant Abbreviations: AML, amlexanox paste; AV, aloe vera; CUR, curcumin gel; PDT, photodynamic therapy; PLA, placebo; PUR, purslane; SysCORT, systemic corticosteroid; TopCALN, topical calcineurin; TopCORT, topical corticosteroid

**Supplementary Table S4.** Results of network meta-analysis: Adverse Effects with SUCRA ranking.

| Interventions  | Adverse Effects        |               |                    |
|----------------|------------------------|---------------|--------------------|
|                | Relative Risk (95% CI) | P-value       | SUCRA rank (Score) |
| <b>PLA</b>     | Reference              |               | 1 (74.9)           |
| <b>PUR</b>     | 0.86 (0.01- 58.75)     | 0.943         | 2 (63.0)           |
| <b>AML</b>     | 1.31 (0.12- 14.15)     | 0.822         | 3 (58.4)           |
| <b>CUR</b>     | 1.94 (0.03-150.07)     | 0.764         | 4 (50.3)           |
| <b>TopCORT</b> | 1.94 (0.75- 5.06)      | 0.173         | 5 (49.1)           |
| <b>AV</b>      | 2.51 (0.24- 25.76)     | 0.438         | 6 (40.1)           |
| <b>PDT</b>     | 2.43 (0.35- 16.96)     | 0.370         | 7 (38.1)           |
| <b>TopCALN</b> | 3.25 (1.19- 8.86)      | <b>0.022*</b> | 8 (26.1)           |

Note: presence of (\*) and texts in red indicates intervention is statistically significant. Abbreviations: AML, amlexanox paste; AV, aloe vera; CUR, curcumin gel; PDT, photodynamic therapy; PLA, placebo; PUR, purslane; SysCORT, systemic corticosteroid; TopCALN, topical calcineurin; TopCALNcoSysCORT, topical calcineurin combined with systemic corticosteroid; TopCORT, topical corticosteroid



**Supplementary Table S5.** Results of network meta-analysis: Clinical Resolution of Oral Lichen Planus with SUCRA ranking.

| Interventions  | Clinical Resolution of Oral Lichen Planus |               |                    |
|----------------|-------------------------------------------|---------------|--------------------|
|                | Relative Risk (95% CI)                    | P-value       | SUCRA rank (Score) |
| <b>TopCALN</b> | 3.07 (1.20- 7.83)                         | <b>0.019*</b> | 1 (72.0)           |
| <b>PDT</b>     | 3.02 (0.85- 10.66)                        | 0.086         | 2 (69.0)           |
| <b>AV</b>      | 2.19 (0.54-8.99)                          | 0.274         | 3 (50.6)           |
| <b>CUR</b>     | 2.19 (0.10- 48.56)                        | 0.620         | 4 (50.0)           |
| <b>AML</b>     | 1.97 (0.36- 10.89)                        | 0.437         | 5 (48.8)           |
| <b>TopCORT</b> | 2.19 (0.95- 5.04)                         | 0.066         | 6 (47.7)           |
| <b>PLA</b>     | Reference                                 |               | 7 (12.0)           |

Note: presence of (\*) and texts in red indicates intervention is statistically significant. Abbreviations: AML, amlexanox paste; AV, aloe vera; CUR, curcumin gel; PDT, photodynamic therapy; PLA, placebo; TopCALN, topical calcineurin; TopCORT, topical corticosteroid.

**Supplementary Table S6** : Results of network meta-analysis: Clinical Score with SUCRA ranking.

| Interventions | Clinical Score           |               |                    |
|---------------|--------------------------|---------------|--------------------|
|               | Mean Difference (95% CI) | P-value       | SUCRA rank (Score) |
| PLA           | Reference                |               | 1 (89.7)           |
| SysCORT       | -0.42 (-2.35- 1.51)      | 0.672         | 2 (70.8)           |
| HA            | -0.75 (-2.01- 0.50)      | 0.240         | 3 (57.2)           |
| AML           | -0.89 (-2.83- 1.06)      | 0.373         | 4 (55.4)           |
| TopCALN       | -1.02 (-2.07- 0.02)      | 0.055         | 5 (46.9)           |
| AV            | -1.07 (-2.26- 0.12)      | 0.078         | 6 (46.1)           |
| TopCORT       | -1.02 (-1.97- (-0.06))   | <b>0.037*</b> | 7 (46.0)           |
| CUR           | -1.36 (-3.28- 0.57)      | 0.167         | 8 (37.8)           |
| PDT           | -5.92 (-8.15- (-3.68))   | <b>0.000*</b> | 9 (0.0)            |

Note: presence of (\*) and texts in red indicates intervention is statistically significant. Abbreviations: AML, amlexanox paste; AV, aloe vera; CUR, curcumin gel; PDT, photodynamic therapy; PLA, placebo; PUR, purslane; SysCORT, systemic corticosteroid; TopCALN, topical calcineurin; TopCORT, topical corticosteroid; HA, hyaluronic acid.

**Supplementary Table S7.** Results of network meta-analysis: Pain Score with SUCRA ranking.

| Interventions  | Pain Score               |               |                    |
|----------------|--------------------------|---------------|--------------------|
|                | Mean Difference (95% CI) | P-value       | SUCRA rank (Score) |
| <b>PDT</b>     | -1.63 (-2.73- (-0.53))   | <b>0.004*</b> | 1 (94.1)           |
| <b>TopCALN</b> | -0.77 (-1.54- (-0.00))   | <b>0.049*</b> | 2 (67.0)           |
| <b>AML</b>     | -0.67 (-2.29- 0.95)      | 0.420         | 3 (56.4)           |
| <b>TopCORT</b> | -0.59 (-1.40- 0.21)      | 0.150         | 4 (55.4)           |
| <b>HA</b>      | -0.48 (-2.10-1.13)       | 0.557         | 5 (48.9)           |
| <b>SysCORT</b> | -0.43 (-2.52- 1.66)      | 0.686         | 6 (48.1)           |
| <b>CUR</b>     | -0.27 (-1.86- 1.32)      | 0.736         | 7 (36.8)           |
| <b>PLA</b>     | Reference                |               | 8 (24.5)           |
| <b>AV</b>      | 0.19 (-0.92- 1.30)       | 0.731         | 9 (18.8)           |

Note: presence of (\*) and texts in red indicates intervention is statistically significant. Abbreviations: AML, amlexanox paste; AV, aloe vera; CUR, curcumin gel; PDT, photodynamic therapy; PLA, placebo; PUR, purslane; SysCORT, systemic corticosteroid; TopCALN, topical calcineurin; TopCORT, topical corticosteroid; HA, hyaluronic acid.

**Supplementary Table S8.** Results of network meta-analysis: Clinical improvement of Oral Lichen Planus (subgroup analysis) with SUCRA ranking.

| Interventions | Clinical Improvement in Oral Lichen Planus (Subgroup Analysis) |               |                    |
|---------------|----------------------------------------------------------------|---------------|--------------------|
|               | Relative Risk (95% CI)                                         | P-value       | SUCRA rank (Score) |
| <b>PUR</b>    | 4.53 (1.49- 13.80)                                             | <b>0.008*</b> | 1 (98.1)           |
| <b>CUR</b>    | 1.52 (0.83- 2.81)                                              | 0.178         | 2 (68.6)           |
| <b>AV</b>     | 1.53 (1.08- 2.15)                                              | <b>0.016*</b> | 3 (68.5)           |
| <b>PDT</b>    | 1.47 (0.95- 2.27)                                              | 0.082         | 4 (66.3)           |
| <b>TAC</b>    | 1.44 (1.06- 1.95)                                              | <b>0.019*</b> | 5 (64.7)           |
| <b>FLU</b>    | 1.5 (0.88-2.56)                                                | 0.137         | 6 (64.6)           |
| <b>CLO</b>    | 1.35 (1.02- 1.78)                                              | <b>0.037*</b> | 7 (55.6)           |
| <b>PIM</b>    | 1.27 (0.88- 1.84)                                              | 0.206         | 8 (48.3)           |
| <b>BET</b>    | 1.25 (0.80- 1.97)                                              | 0.324         | 9 (44.8)           |
| <b>TA</b>     | 1.20 (0.89- 1.62)                                              | 0.222         | 10 (39.4)          |
| <b>DEX</b>    | 0.74 (0.20-2.74)                                               | 0.647         | 11 (24.8)          |
| <b>PLA</b>    | Reference                                                      |               | 12 (20.1)          |
| <b>AML</b>    | 0.66 (0.17- 2.64)                                              | 0.559         | 13 (19.1)          |
| <b>CYC</b>    | 0.93 (0.61- 1.41)                                              | 0.728         | 14 (17.0)          |

Note: presence of (\*) and texts in red indicates intervention is statistically significant. Abbreviations: AML, amlexanox paste; AV, aloe vera; CUR, curcumin gel; PDT, photodynamic therapy; PLA, placebo; PUR, purslane; TAC, tacrolimus; FLU, flucanionide acetone; CLO, clobetasol propionate; PIM, pimecrolimus; BET, betamethasone; TA, triamcinolone acetone; DEX, dexamethasone; CYC, cyclosporine.

**Supplementary Table S9.** Results of network meta-analysis: Adverse Effects (subgroup analysis) with SUCRA ranking.

| Interventions | Adverse Effects (Subgroup Analysis) |               |                    |
|---------------|-------------------------------------|---------------|--------------------|
|               | Relative Risk (95% CI)              | P-value       | SUCRA rank (Score) |
| <b>BET</b>    | 0.73 (0.29- 1.85)                   | 0.507         | 1 (84.3)           |
| <b>PLA</b>    | Reference                           |               | 2 (76.9)           |
| <b>TA</b>     | 1.11 (0.38- 3.23)                   | 0.845         | 3 (74.0)           |
| <b>CUR</b>    | 1.11 (0.02- 65.72)                  | 0.959         | 4 (66.2)           |
| <b>PUR</b>    | 0.86 (0.02- 43.41)                  | 0.939         | 5 (65.6)           |
| <b>FLU</b>    | 1.00 (0.02- 50.84)                  | 1.000         | 6 (63.3)           |
| <b>PIM</b>    | 2.39 (0.80- 7.17)                   | 0.120         | 7 (51.0)           |
| <b>TAC</b>    | 2.89 (0.95- 8.81)                   | 0.062         | 8 (45.2)           |
| <b>AV</b>     | 3.05 (0.37- 25.40)                  | 0.301         | 9 (44.3)           |
| <b>PDT</b>    | 4.53 (0.77- 26.65)                  | 0.094         | 10 (32.4)          |
| <b>CYC</b>    | 4.97 (1.21- 20.34)                  | <b>0.026*</b> | 11 (30.0)          |
| <b>AML</b>    | 6.08 (0.52-70.89)                   | 0.150         | 12 (28.9)          |
| <b>CLO</b>    | 6.25 (2.05- 19.10)                  | <b>0.001*</b> | 13 (22.0)          |
| <b>DEX</b>    | 9.01 (1.30-62.67)                   | <b>0.026*</b> | 14 (15.8)          |

Note: presence of (\*) and texts in red indicates intervention is statistically significant. Abbreviations: AML, amlexanox paste; AV, aloe vera; CUR, curcumin gel; PDT, photodynamic therapy; PLA, placebo; PUR, purslane; TAC, tacrolimus; FLU, flucinonide acetone; CLO, clobetasol propionate; PIM, pimecrolimus; BET, betamethasone; TA, triamcinolone acetone; DEX, dexamethasone; CYC, cyclosporine.

**Supplementary Table S10.** Results of network meta-analysis: Clinical Resolution of Oral Lichen Planus (subgroup analysis) with SUCRA ranking.

| Interventions | Clinical Resolution (Subgroup Analysis) |               |                    |
|---------------|-----------------------------------------|---------------|--------------------|
|               | Relative Risk (95% CI)                  | P-value       | SUCRA rank (Score) |
| TAC           | 5.40 (1.48- 19.67)                      | <b>0.011*</b> | 1 (83.1)           |
| FLU           | 9.00 (0.41- 198.97)                     | 0.164         | 2 (79.2)           |
| PDT           | 3.55 (0.84- 14.94)                      | 0.085         | 3 (66.8)           |
| PIM           | 2.74 (0.89- 8.37)                       | 0.078         | 4 (58.1)           |
| CLO           | 2.75 (0.92- 8.22)                       | 0.069         | 5 (57.2)           |
| TA            | 2.72 (0.82- 9.07)                       | 0.104         | 6 (56.5)           |
| CUR           | 2.72 (0.11- 66.74)                      | 0.540         | 7 (55.2)           |
| AV            | 2.18 (0.55- 8.67)                       | 0.268         | 8 (50.1)           |
| DEX           | 1.18 (0.03- 44.83)                      | 0.928         | 9 (36.8)           |
| AML           | 1.06 (0.02- 53.30)                      | 0.975         | 10 (35.6)          |
| BET           | 1.34 (0.43- 4.17)                       | 0.618         | 11 (33.1)          |
| PLA           | Reference                               |               | 12 (20.4)          |
| CYC           | 0.72 (0.12- 4.36)                       | 0.724         | 13 (17.8)          |

Note: presence of (\*) and texts in red indicates intervention is statistically significant. Abbreviations: AML, amlexanox paste; AV, aloe vera; CUR, curcumin gel; PDT, photodynamic therapy; PLA, placebo; PUR, purslane; TAC, tacrolimus; FLU, flucanionide acetone; CLO, clobetasol propionate; PIM, pimecrolimus; BET, betamethasone; TA, triamcinolone acetone; DEX, dexamethasone; CYC, cyclosporine.

**Supplementary Table S11.** Results of network meta-analysis: Clinical Score (subgroup analysis) with SUCRA ranking.

| Interventions | Clinical Score (Subgroup Analysis) |               |                    |
|---------------|------------------------------------|---------------|--------------------|
|               | Mean Difference (95% CI)           | P-value       | SUCRA rank (Score) |
| PLA           | Reference                          |               | 1 (78.9)           |
| BET           | -0.52 (-3.35- 2.32)                | 0.720         | 2 (62.6)           |
| HA            | -0.80 (-2.53- 0.93)                | 0.364         | 3 (56.3)           |
| PIM           | -0.86 (-3.30- 1.58)                | 0.492         | 4 (55.2)           |
| DEX           | -0.07 (-62.08- 61.95)              | 0.998         | 5 (54.5)           |
| CYC           | -0.89 (-2.66- 0.89)                | 0.329         | 6 (54.3)           |
| AML           | 0.06 (-61.95- 62.07)               | 0.998         | 7 (54.2)           |
| CLO           | -1.02 (-2.59- 0.54)                | 0.199         | 8 (52.4)           |
| FLU           | -1.11 (-3.21- 1.00)                | 0.303         | 9 (48.7)           |
| AV            | -1.08 (-2.56- 0.39)                | 0.150         | 10 (47.9)          |
| TA            | -1.12 (-3.05- 0.81)                | 0.256         | 11 (46.6)          |
| TAC           | -1.25 (-3.03- 0.53)                | 0.170         | 12 (43.2)          |
| CUR           | -1.46 (-4.29- 1.38)                | 0.314         | 13 (39.3)          |
| PDT           | -5.92 (-8.76- (-3.09))             | <b>0.000*</b> | 14 (6.1)           |

Note: presence of (\*) and texts in red indicates intervention is statistically significant. Abbreviations: AML, amlexanox paste; AV, aloe vera; CUR, curcumin gel; PDT, photodynamic therapy; PLA, placebo; PUR, purslane; TAC, tacrolimus; FLU, flucanionide acetone; CLO, clobetasol propionate; PIM, pimecrolimus; BET, betamethasone; TA, triamcinolone acetone; DEX, dexamethasone; CYC, cyclosporine; HA, hyaluronic acid.

**Supplementary Table S12.** Results of network meta-analysis: Pain Score (subgroup analysis) with SUCRA ranking.

| Interventions | Pain Score (Subgroup Analysis) |               |                    |
|---------------|--------------------------------|---------------|--------------------|
|               | Mean Difference (95% CI)       | P-value       | SUCRA rank (Score) |
| <b>PDT</b>    | -1.90 (-3.07- (-0.73))         | <b>0.001*</b> | 1 (92.1)           |
| <b>TAC</b>    | -1.61 (-2.78- (-0.45))         | <b>0.007*</b> | 2 (86.3)           |
| <b>CLO</b>    | -0.93 (-1.88- 0.02)            | 0.055         | 3 (59.5)           |
| <b>CYC</b>    | -0.87 (-1.93- 0.18)            | 0.106         | 4 (59.0)           |
| <b>TA</b>     | -0.75 (-1.79- 0.29)            | 0.159         | 5 (53.7)           |
| <b>HA</b>     | -0.64 (-2.38- 1.10)            | 0.469         | 6 (46.1)           |
| <b>PRED</b>   | -0.59 (-2.77- 1.59)            | 0.596         | 7 (44.3)           |
| <b>PIM</b>    | -0.42 (-1.37- 0.53)            | 0.382         | 8 (37.1)           |
| <b>CUR</b>    | -0.43 (-2.15- 1.28)            | 0.622         | 9 (35.7)           |
| <b>AV</b>     | 0.07 (-1.05- 1.18)             | 0.907         | 10 (18.5)          |
| <b>PLA</b>    | Reference                      |               | 11 (17.7)          |

Note: presence of (\*) and texts in red indicates intervention is statistically significant. Abbreviations: AML, amlexanox paste; AV, aloe vera; CUR, curcumin gel; PDT, photodynamic therapy; PLA, placebo; PUR, purslane; TAC, tacrolimus; FLU, flucanionide acetone; CLO, clobetasol propionate; PIM, pimecrolimus; BET, betamethasone; TA, triamcinolone acetone; DEX, dexamethasone; CYC, cyclosporine; HA, hyaluronic acid; PRED; prednisolone.



**Supplementary Table S13.** GRADE Assessment for Quality of Evidence

| Certainty assessment                                                                                                                         |                   |                      |               |              |             |                      | № of patients           |                        | Effect            |                   | Certainty        | Importance |
|----------------------------------------------------------------------------------------------------------------------------------------------|-------------------|----------------------|---------------|--------------|-------------|----------------------|-------------------------|------------------------|-------------------|-------------------|------------------|------------|
| № of studies                                                                                                                                 | Study design      | Risk of bias         | Inconsistency | Indirectness | Imprecision | Other considerations | different interventions | placebo/ interventions | Relative (95% CI) | Absolute (95% CI) |                  |            |
| clinical improvement of oral lichen planus in terms of extension and severity (follow-up: mean 4 weeks; assessed with: signs of improvement) |                   |                      |               |              |             |                      |                         |                        |                   |                   |                  |            |
| 28                                                                                                                                           | randomised trials | serious <sup>a</sup> | not serious   | not serious  | not serious | none                 | 436                     | 357                    | -                 | see comment       | ⊕⊕⊕○<br>Moderate | CRITICAL   |
| reduction in pain score (follow-up: mean 4 weeks; assessed with: VAS score)                                                                  |                   |                      |               |              |             |                      |                         |                        |                   |                   |                  |            |
| 20                                                                                                                                           | randomised trials | serious              | not serious   | not serious  | not serious | none                 |                         |                        | -                 | not estimable     | ⊕⊕⊕○<br>Moderate | IMPORTANT  |
| reduction in clinical score (follow-up: mean 4 weeks; assessed with: mean)                                                                   |                   |                      |               |              |             |                      |                         |                        |                   |                   |                  |            |
| 28                                                                                                                                           | randomised trials | serious              | not serious   | not serious  | not serious | none                 |                         |                        | -                 | not estimable     | ⊕⊕⊕○<br>Moderate | IMPORTANT  |
| clinical resolution (follow-up: mean 4 weeks; assessed with: Thongprasom scale)                                                              |                   |                      |               |              |             |                      |                         |                        |                   |                   |                  |            |
| 20                                                                                                                                           | randomised trials | serious              | not serious   | not serious  | not serious | none                 | 167                     | 113                    | -                 | see comment       | ⊕⊕⊕○<br>Moderate | CRITICAL   |
| adverse effects caused by intervention (follow-up: mean 4 weeks)                                                                             |                   |                      |               |              |             |                      |                         |                        |                   |                   |                  |            |
| 30                                                                                                                                           | randomised trials | serious              | not serious   | not serious  | not serious | none                 | 128                     | 47                     | -                 | see comment       | ⊕⊕⊕○<br>Moderate | CRITICAL   |

## Explanations

a. Eventhough majority of the included articles have Low or unclear risk of bias, 16 articles have high risk of bias. Hence, quality of evidence may be moderate

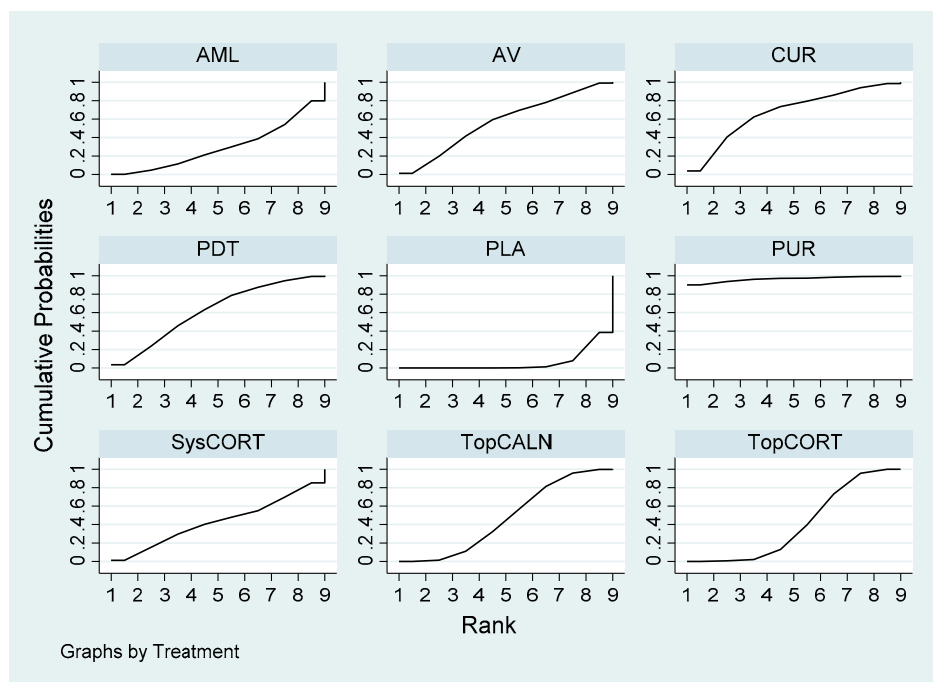

**Supplementary Figure S1. SUCRA ranking curve in Clinical Improvement of OLP**

Abbreviations: AML, amlexanox paste; AV, aloe vera; CUR, curcumin gel; PDT, photodynamic therapy; PLA, placebo; PUR, purslane; SysCORT, systemic corticosteroid; TopCALN, topical calcineurin; TopCALNcoSysCORT, topical calcineurin combined with systemic corticosteroid; TopCORT, topical corticosteroid

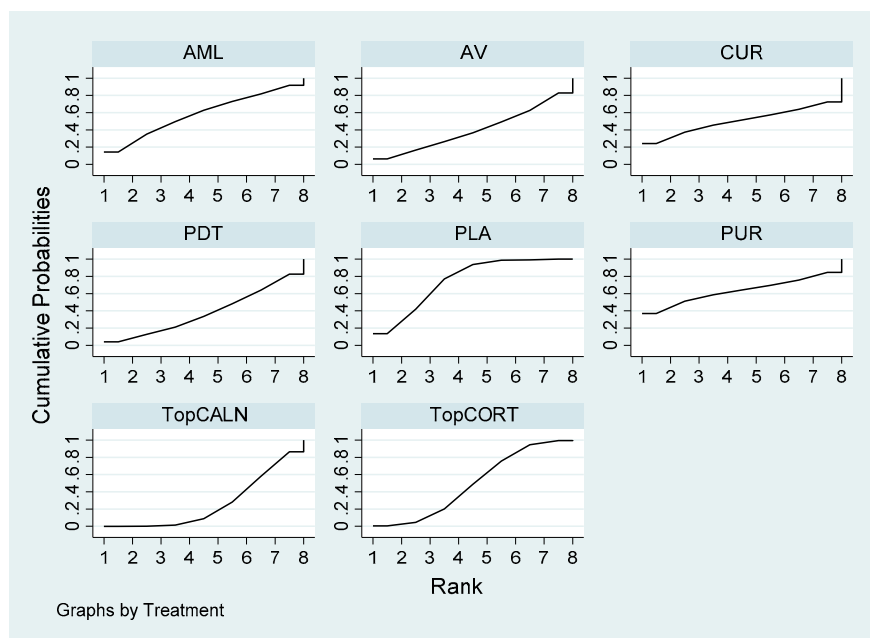

**Supplementary Figure S2. SUCRA ranking curve of Adverse Effects**

Abbreviations: AML, amlexanox paste; AV, aloe vera; CUR, curcumin gel; PDT, photodynamic therapy; PLA, placebo; PUR, purslane; TopCALN, topical calcineurin; TopCORT, topical corticosteroid

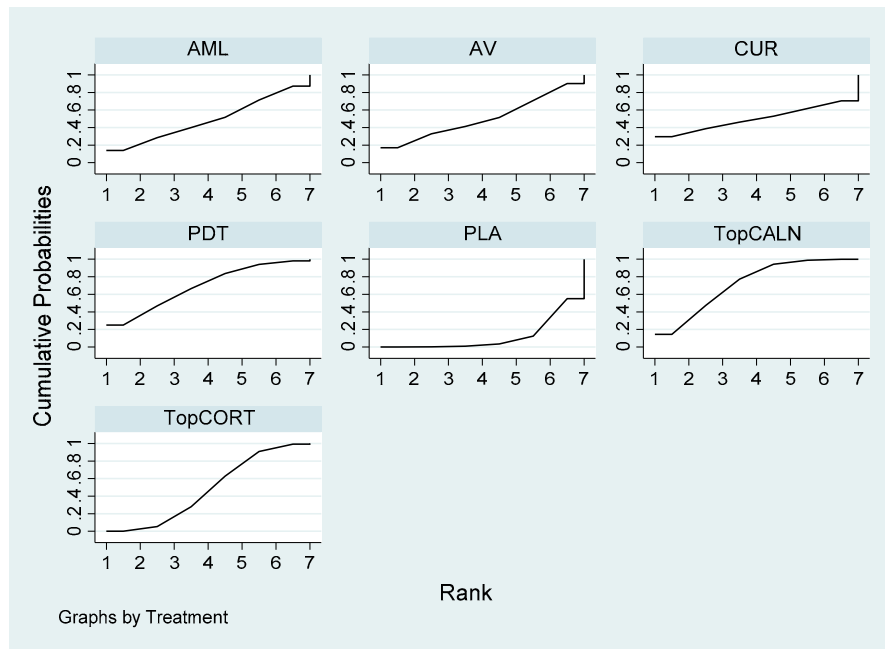

**Supplementary Figure S3:** SUCRA ranking curve of Clinical Resolution or Oral Lichen Planus. Abbreviations: AML, amlexanox paste; AV, aloe vera; CUR, curcumin gel; PDT, photodynamic therapy; PLA, placebo; PUR, purslane; TopCALN, topical calcineurin; TopCORT, topical corticosteroid

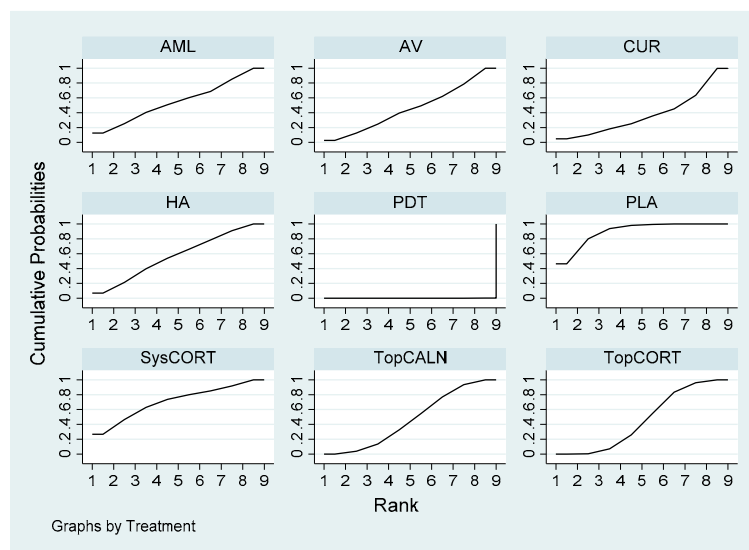

**Supplementary Figure S4.** SUCRA ranking curve of Clinical Score. Abbreviations: AML, amlexanox paste; AV, aloe vera; CUR, curcumin gel; PDT, photodynamic therapy; PLA, placebo; PUR, purslane; SysCORT, systemic corticosteroid; TopCALN, topical calcineurin; TopCORT, topical corticosteroid; HA, hyaluronic acid

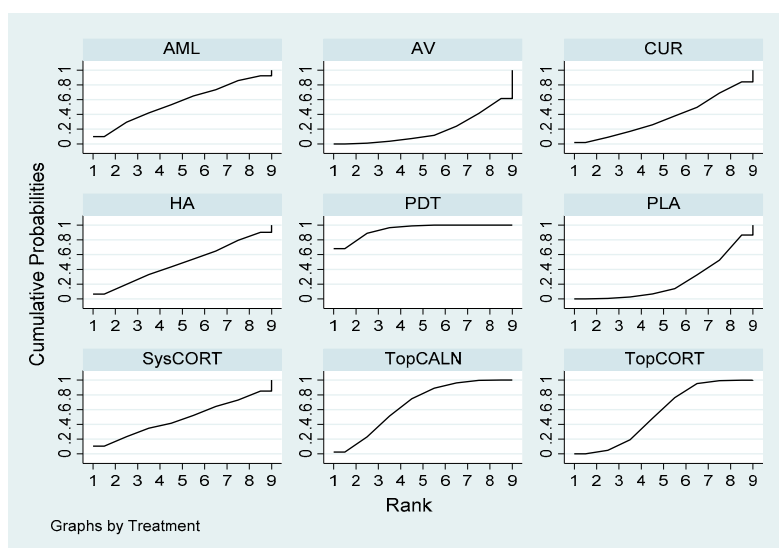

**Supplementary Figure S5.** SUCRA ranking curve of Pain Score. Abbreviations: AML, amlexanox paste; AV, aloe vera; CUR, curcumin gel; PDT, photodynamic therapy; PLA, placebo; PUR, purslane; SysCORT, systemic corticosteroid; TopCALN, topical calcineurin; TopCORT, topical corticosteroid; HA, hyaluronic acid

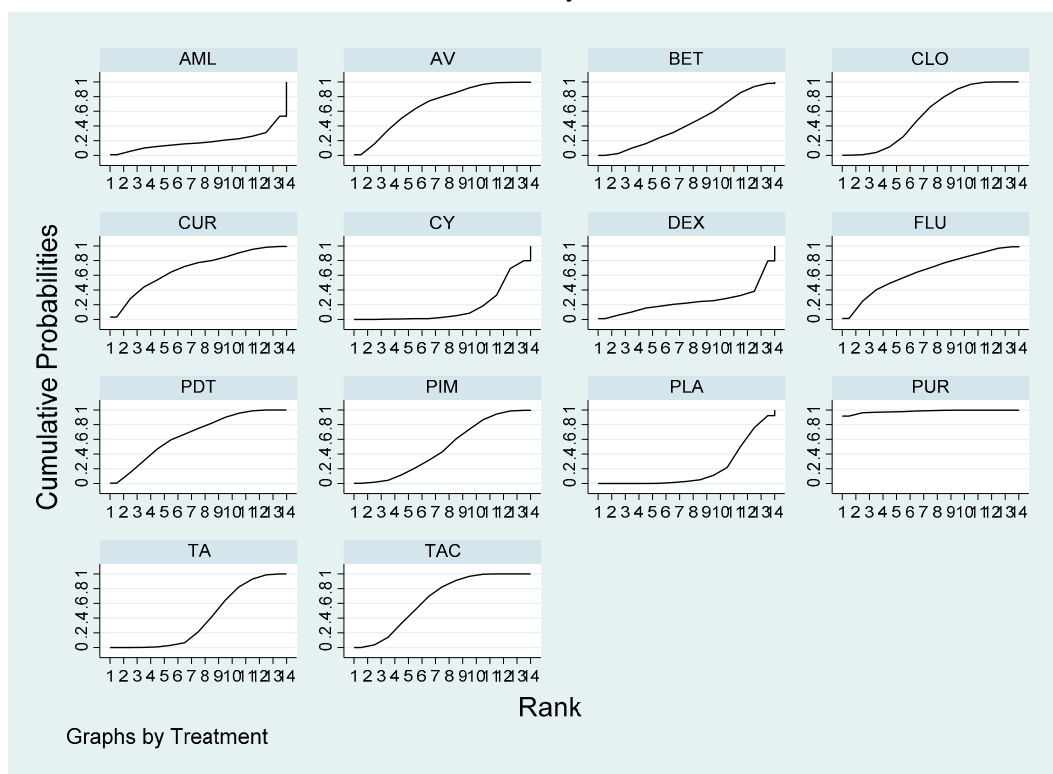

**Supplementary Figure S6.** SUCRA ranking curve in Clinical Improvement of OL (subgroup). Abbreviations: AML, amlexanox paste; AV, aloe vera; CUR, curcumin gel; PDT, photodynamic therapy; PLA, placebo; PUR, purslane; TAC, tacrolimus; FLU, flucanide acetone; CLO, clobetasol propionate; PIM, pimecrolimus; BET, betamethasone; TA, triamcinolone acetone; DEX, dexamethasone; CYC, cyclosporine.

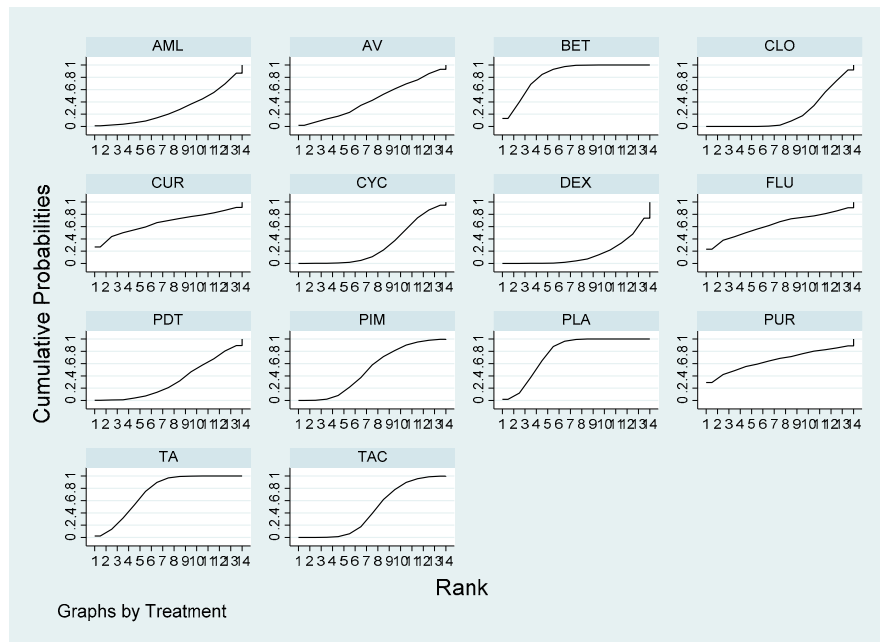

**Supplementary Figure S7.** SUCRA ranking curve of Adverse Effects. Abbreviations: AML, amlexanox paste; AV, aloe vera; CUR, curcumin gel; PDT, photodynamic therapy; PLA, placebo; PUR, purslane; TAC, tacrolimus; FLU, flucanionide acetone; CLO, clobetasol propionate; PIM, pimecrolimus; BET, betamethasone; TA, triamcinolone acetone; DEX, dexamethasone; CYC, cyclosporine.

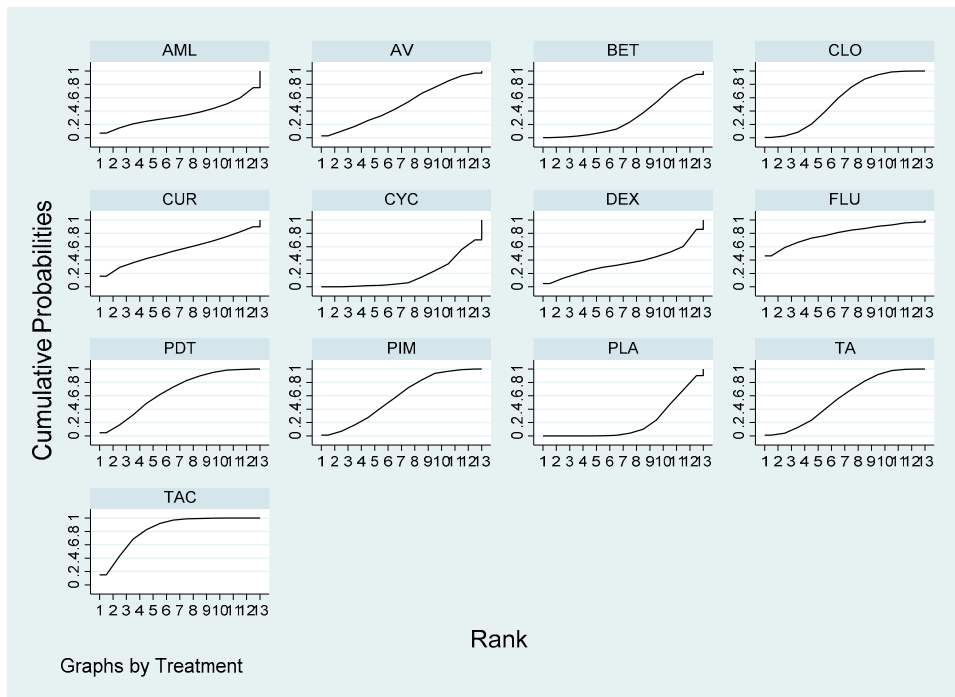

**Supplementary Figure S8:** SUCRA ranking curve of Clinical Resolution or Oral Lichen Planus. Abbreviations: AML, amlexanox paste; AV, aloe vera; CUR, curcumin gel; PDT, photodynamic therapy; PLA, placebo; PUR, purslane; TAC, tacrolimus; FLU, flucanionide acetone; CLO, clobetasol propionate; PIM, pimecrolimus; BET, betamethasone; TA, triamcinolone acetone; DEX, dexamethasone; CYC, cyclosporine.

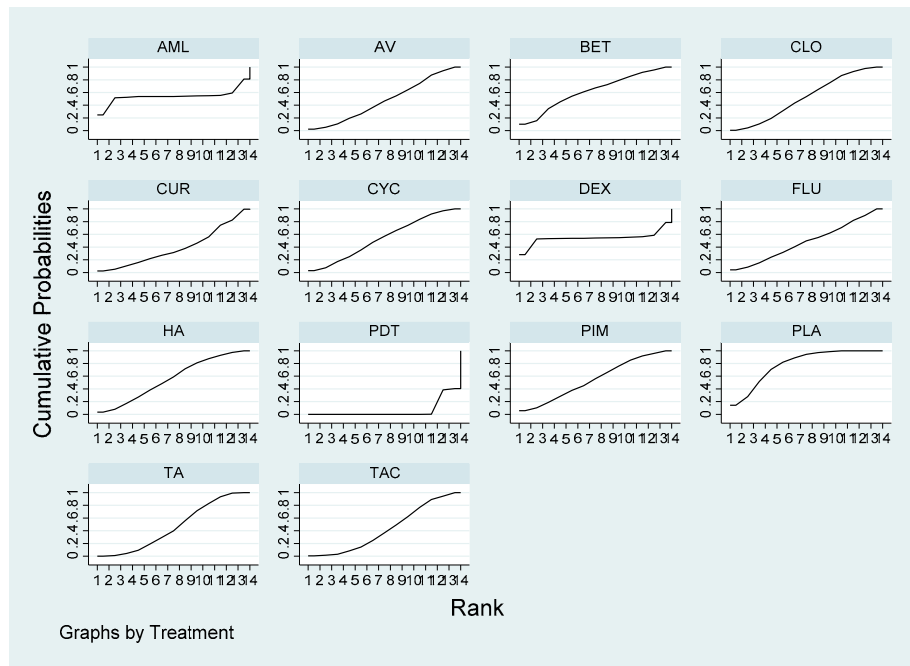

**Supplementary Figure S9: SUCRA ranking curve of Clinical Score**

Abbreviations: AML, amlexanox paste; AV, aloe vera; CUR, curcumin gel; PDT, photodynamic therapy; PLA, placebo; PUR, purslane; TAC, tacrolimus; FLU, flucanide acetone; CLO, clobetasol propionate; PIM, pimecrolimus; BET, betamethasone; TA, triamcinolone acetone; DEX, dexamethasone; CYC, cyclosporine; HA, hyaluronic acid

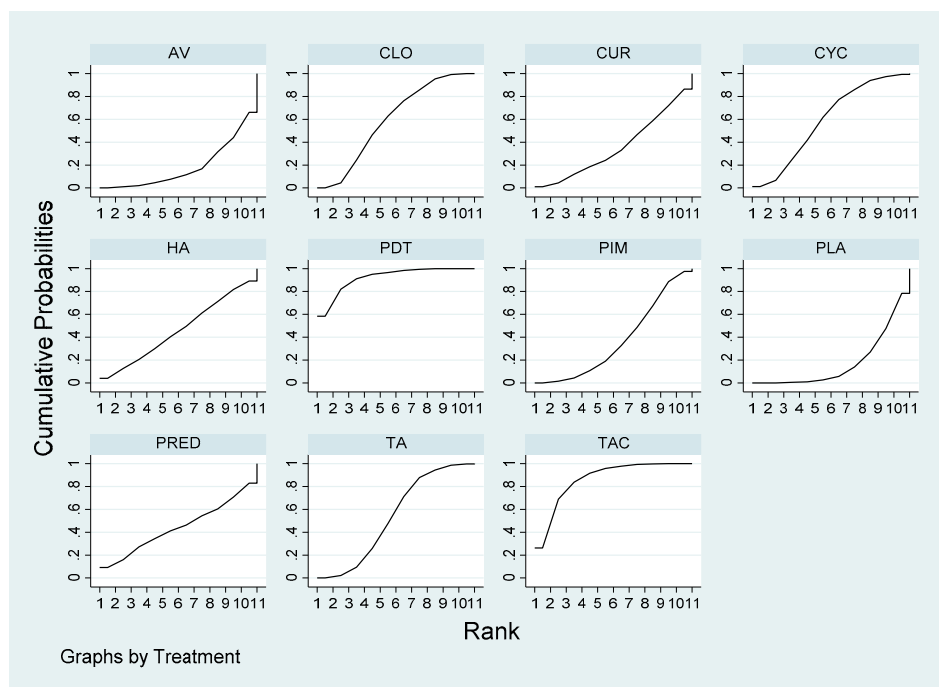

**Supplementary Figure S10. SUCRA ranking curve of Pain Score**

Abbreviations: AML, amlexanox paste; AV, aloe vera; CUR, curcumin gel; PDT, photodynamic therapy; PLA, placebo; PUR, purslane; TAC, tacrolimus; FLU, flucanide acetone; CLO, clobetasol propionate; PIM, pimecrolimus; BET, betamethasone; TA, triamcinolone acetone; DEX, dexamethasone; CYC, cyclosporine; HA, hyaluronic acid; PRED; prednisolone

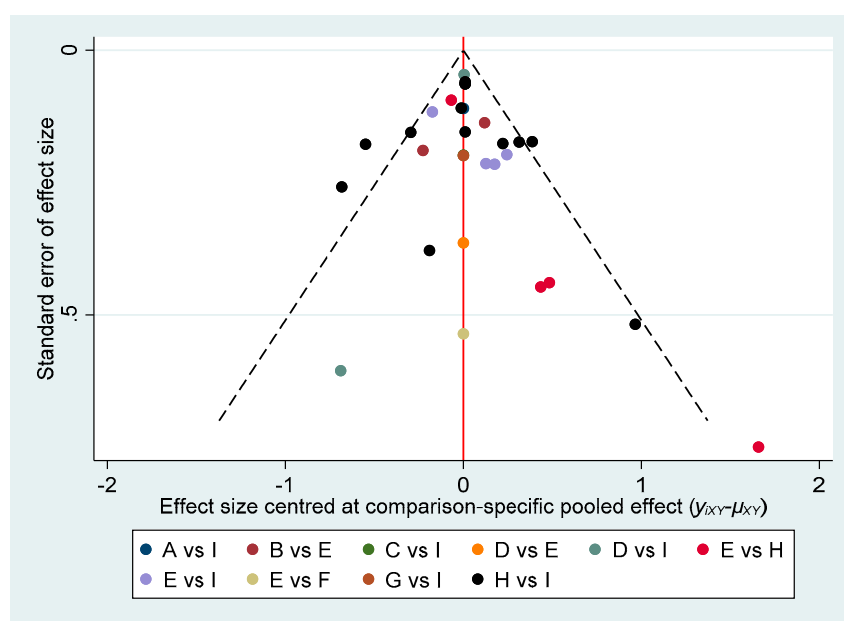

**Supplementary Figure S11.** Comparison-adjusted funnel plot for Clinical Improvement of Oral Lichen Planus

Abbreviations: A= amlexanox paste; B= aloe vera; C= curcumin gel; D= photodynamic therapy; E= placebo; F= purslane; G= systemic corticosteroid; H= topical calcineurin; I= combination of topical calcineurin and systemic corticosteroid; J= topical corticosteroid

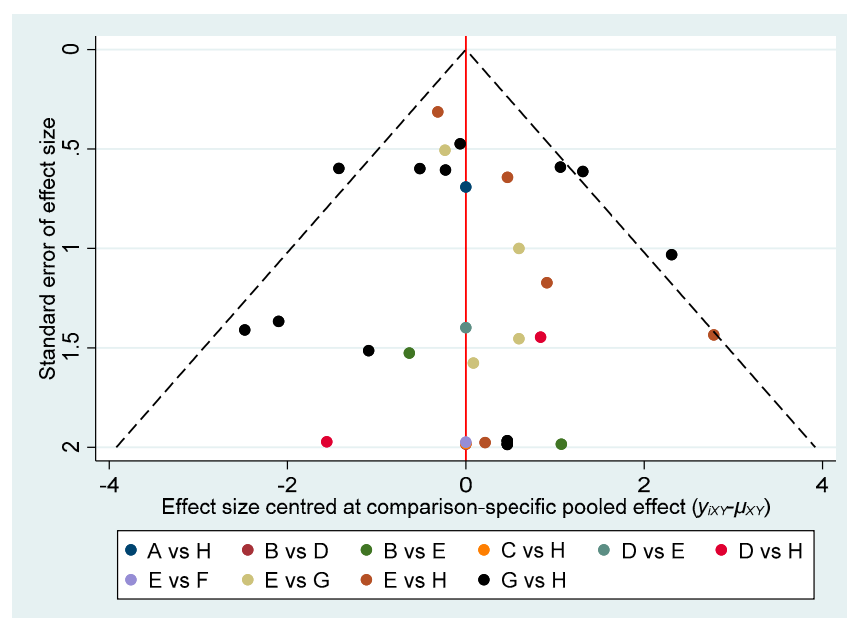

**Supplementary Figure S12:** Comparison-adjusted funnel plot for Adverse Effects

Abbreviations: A= amlexanox paste; B= aloe vera; C= curcumin gel; D= photodynamic therapy; E= placebo; F= purslane; G= topical calcineurin; H= topical corticosteroid

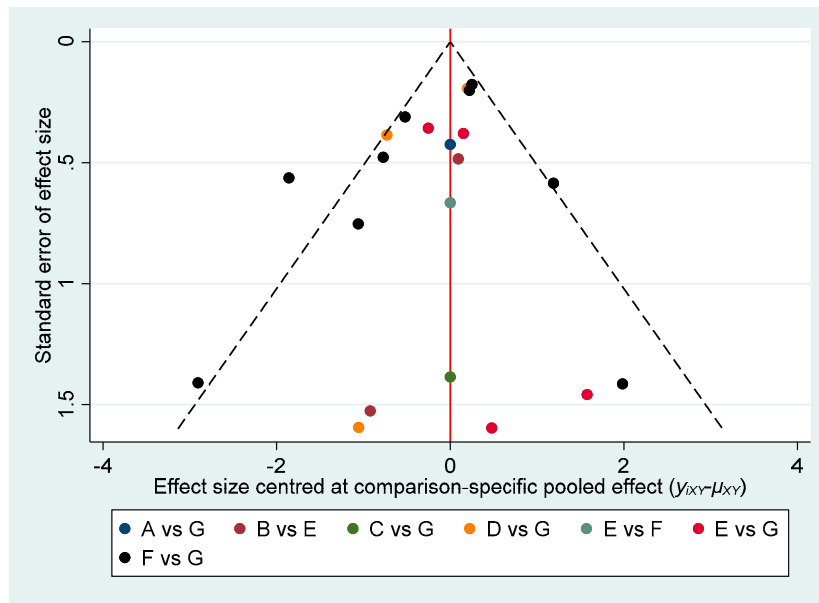

**Supplementary Figure S13:** Comparison-adjusted funnel plot for Clinical Resolutions  
 Abbreviations: A= amlexanox paste; B= aloe vera; C= curcumin gel; D= photodynamic therapy; E= placebo; F= purslane; G= systemic corticosteroid; H= topical calcineurin; I= combination of topical calcineurin and systemic corticosteroid; J= topical corticosteroid

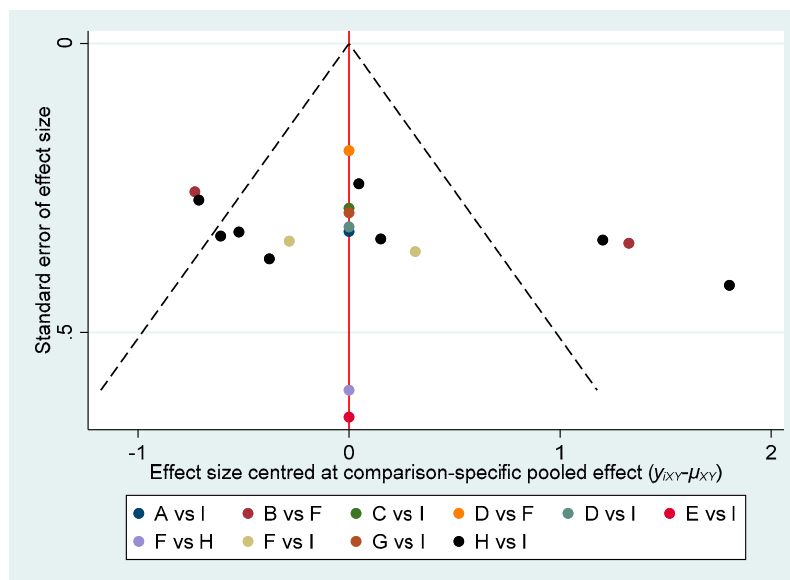

**Supplementary Figure S14.** Comparison-adjusted funnel plot for Clinical Scores  
 Abbreviations: A= amlexanox paste; B= aloe vera; C= curcumin gel; D= photodynamic therapy; E= placebo; F= purslane; G= systemic corticosteroid; H= topical calcineurin; I= combination of topical calcineurin and systemic corticosteroid; J= topical corticosteroid



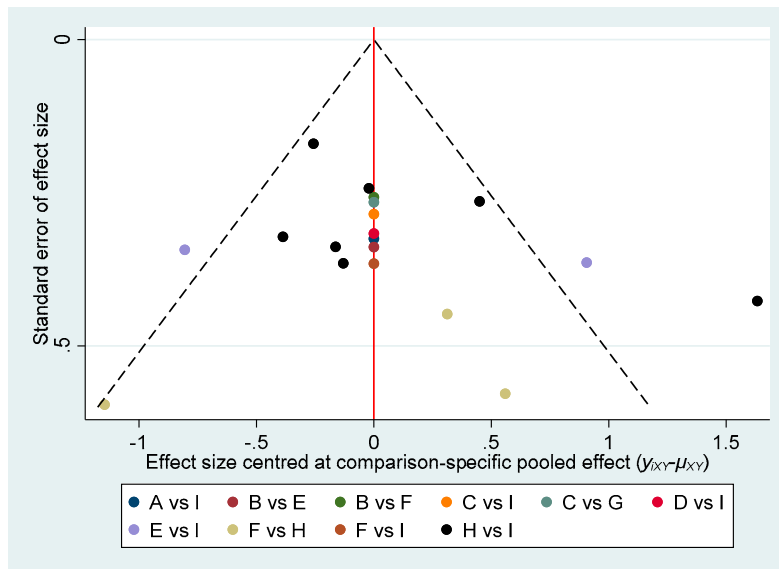

**Supplementary Figure S15:** Comparison-adjusted funnel plot for Pain Scores

Abbreviations: A= amlexanox paste; B= aloe vera; C= curcumin gel; D= photodynamic therapy; E= placebo; F= purslane; G= systemic corticosteroid; H= topical calcineurin; I= combination of topical calcineurin and systemic corticosteroid; J= topical corticosteroid

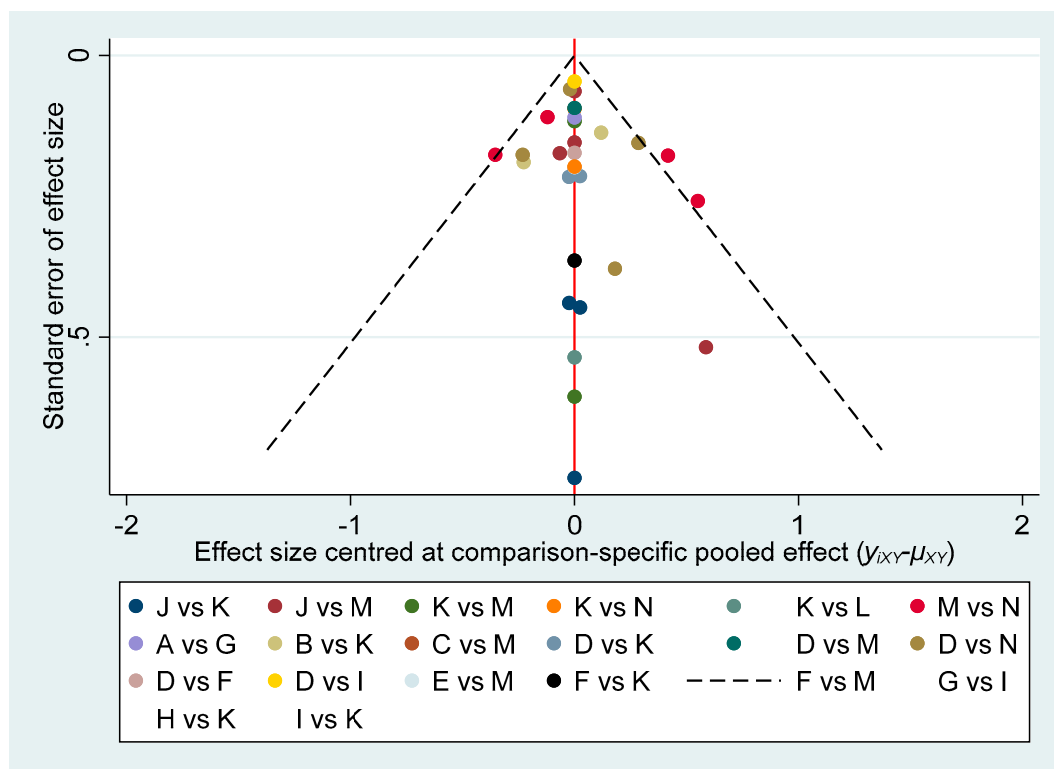

**Supplementary Figure S16:** Comparison-adjusted funnel plot for Clinical Improvement of Oral Lichen Planus

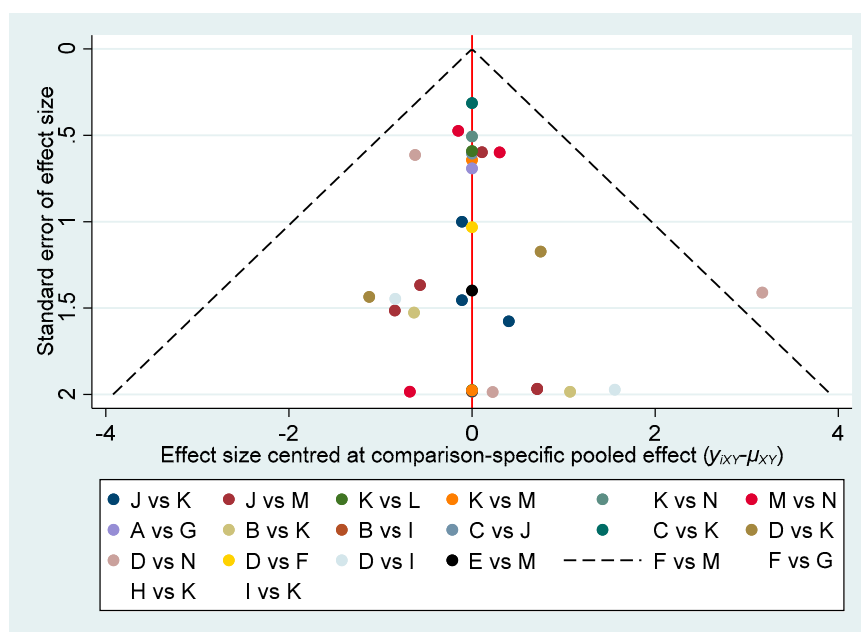

**Supplementary Figure S17.** Comparison-adjusted funnel plot for Adverse effects of Oral Lichen Planus

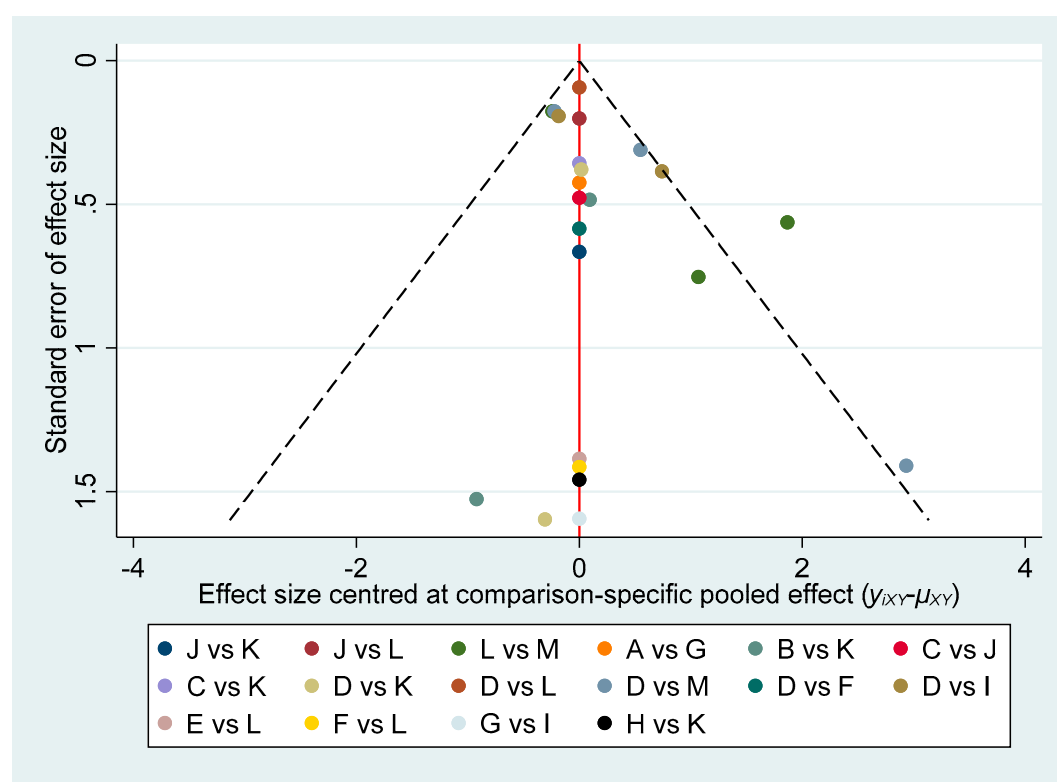

**Supplementary Figure S18.** Comparison-adjusted funnel plot for Clinical Resolution of Oral Lichen Planus

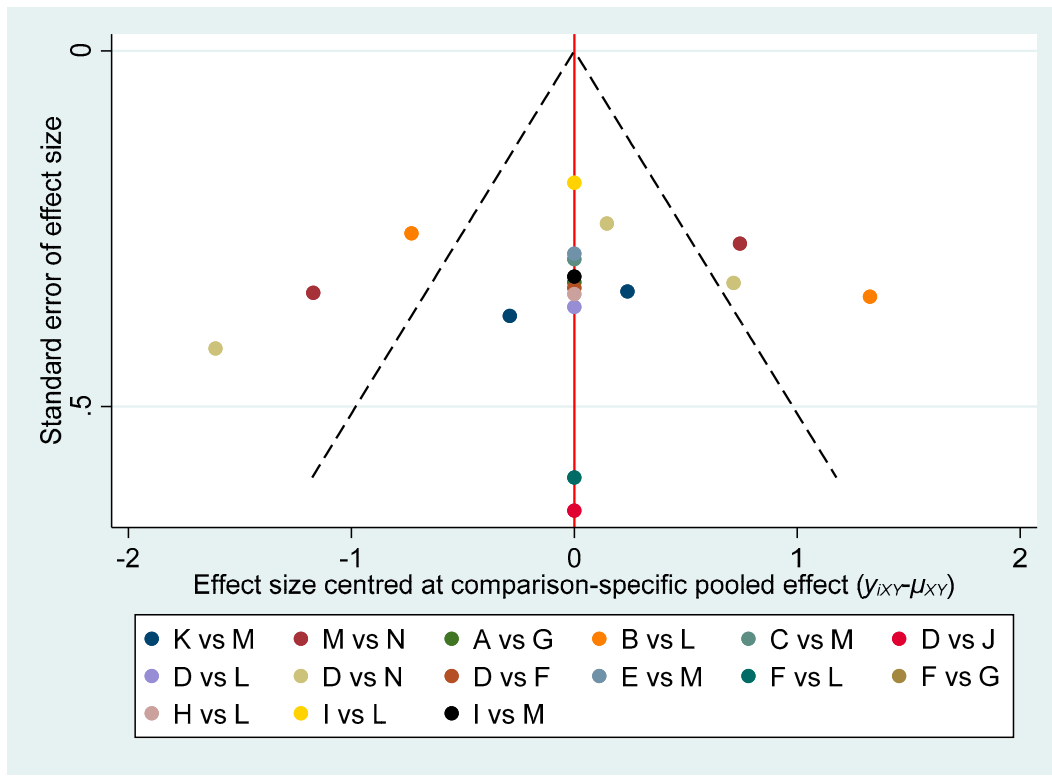

**Supplementary Figure S19.** Comparison-adjusted funnel plot for Clinical Score of Oral Lichen Planus

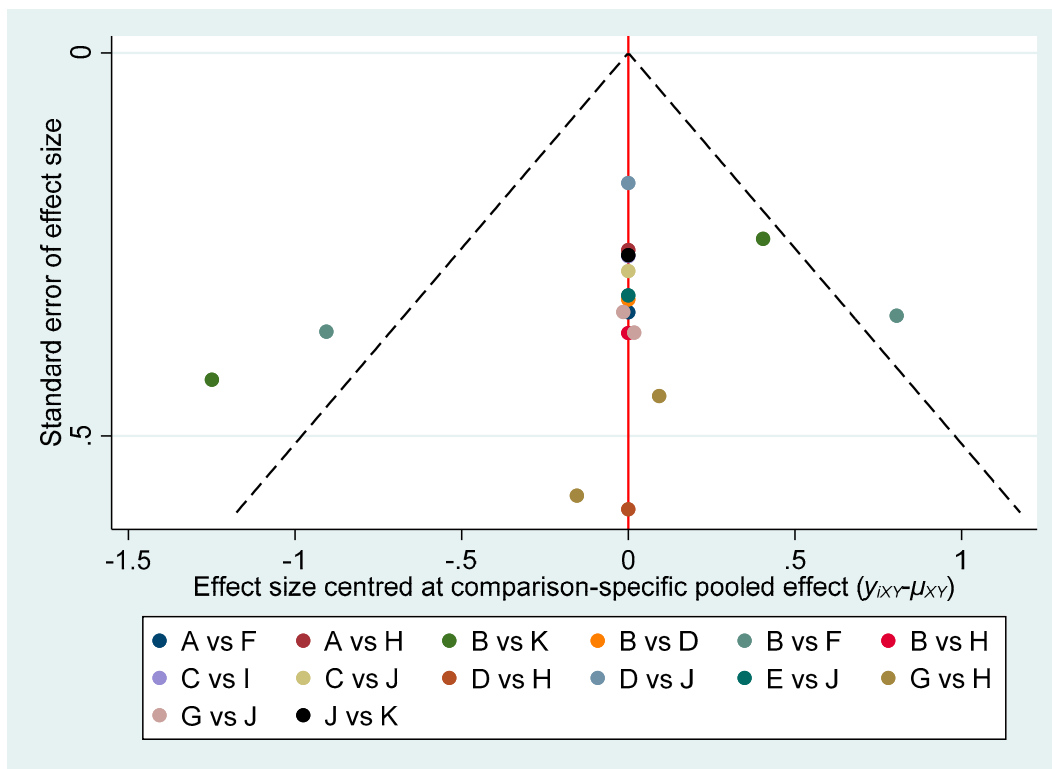

**Supplementary Figure S20.** Comparison-adjusted funnel plot for Pain Score of Oral Lichen Planus
